# Matching the forecast horizon with the relevant ecological processes

Peter B. Adler<sup>1</sup>, Ethan P. White<sup>2,3,4</sup> and Michael H. Cortez<sup>5</sup>

<sup>1</sup>Department of Wildland Resources and the Ecology Center, Utah State University,  
Logan, Utah

<sup>2</sup>Department of Wildlife Ecology and Conservation, University of Florida, Gainesville,  
Florida

<sup>3</sup>Informatics Institute, University of Florida, Gainesville, Florida

<sup>4</sup>Biodiversity Institute, University of Florida, Gainesville, Florida

<sup>5</sup>Department of Biological Science, Florida State University, Tallahassee, Florida

October 15, 2019

## 1 Abstract

2 Most models used to generate ecological forecasts take either a time-series approach, based on  
3 long-term data from one location, or a space-for-time approach, based on data describing spatial  
4 patterns across environmental gradients. Here we consider how the forecast horizon determines  
5 whether the most accurate predictions come from the time-series approach, the space-for-time  
6 approach, or a combination of the two. We use two simulation case studies to show that forecasts  
7 for short and long-time scales need to focus on different ecological processes, which are reflected  
8 in different kinds of data. In the short-term, dynamics reflect initial conditions and fast pro-  
9 cesses such as birth and death, and the phenomenological time-series approach makes the best  
10 predictions. In the long-term, dynamics reflect the additional influence of slower processes such  
11 as evolutionary and ecological selection, colonization and extinction, which the space-for-time  
12 approach can effectively capture. At intermediate time-scales, a weighted average of the two  
13 approaches shows promise. However, making this weighted model operational will require new  
14 research to predict the rate at which slow processes begin to influence dynamics.

15 **Keywords:** dispersal, ecological forecasting, eco-evolutionary dynamics, global change, se-  
16 lection

## 17 Introduction

18 Forecasting is increasingly recognized as important to the application and advancement of eco-  
19 logical research. Forecasts are necessary to guide environmental policy and management deci-  
20 sions about mitigation and adaption to global change (Clark et al., 2001; Mouquet et al., 2015;  
21 Dietze et al., 2018). But forecasts can also advance understanding of the processes governing  
22 ecological systems by providing rigorous tests of model predictions (Houlahan et al., 2017; Di-  
23 etze, 2017; Dietze et al., 2018). The dual benefits of informing management and advancing basic  
24 knowledge makes forecasting an important priority for ecological research.

25 Models used for ecological forecasting typically rely on either time-series approaches or  
26 space-for-time substitutions. The time-series approach involves fitting models to long-term  
27 datasets to describe the temporal dynamics of a system. We then use those dynamic mod-  
28 els to make predictions about what will happen in the future. This approach is often used to  
29 study population or vital rate fluctuations as a function of weather (Dalglish et al., 2011), or  
30 primary production as a function of annual precipitation (Lauenroth and Sala, 1992). Whether  
31 process-based or data-driven (e.g., Ward et al. 2014), time-series models capture “fast processes”  
32 operating on interannual time-scales, such as birth, death, individual growth, small-scale disper-  
33 sal events, and short-term responses to environmental conditions (Fig. 1). However, models built  
34 using this approach normally cover a limited spatial extent (but see Hefley et al. 2017; Kleinhes-  
35 selink and Adler 2018), and ignore slower processes, such as evolutionary adaptation or turnover  
36 in community composition, that could influence dynamics at longer time scales (Clark et al.,  
37 2001).

38 Space-for-time substitution approaches begin by describing how an ecological variable of  
39 interest, such as occupancy or productivity, varies across sites experiencing different environ-  
40 mental conditions. These spatial relationships between environment and ecological response are  
41 assumed to also hold for changes at a site through time. To make a forecast, we first predict the  
42 future environmental conditions and then determine the associated ecological response, based  
43 on the observed spatial relationship. This is the approach commonly used to predict population  
44 distribution or abundance as a function of climate (Elith and Leathwick, 2009) or mean primary  
45 production as a function of mean precipitation (Sala et al., 1988). Space-for-time models capture  
46 the outcome of interactions between fast processes and slower processes operating over long  
47 time periods, such as immigration, extinction, and responses to large or prolonged environmen-  
48 tal changes (Fig. 1). However, space-for-time models provide no information about how quickly  
49 the system will move from the current state to the predicted, future state. In fact, transient dy-  
50 namics could prevent the system from ever reaching the predicted steady state (Urban et al.,  
51 2012). Although both time-series and space-for-time approaches are widely used, there has been  
52 little discussion of their advantages and disadvantages for guiding policy decisions or advancing  
53 our understanding of ecological dynamics (Harris et al., 2018; Renwick et al., 2018).

54 Whether historical dynamics, contemporary spatial patterns, or some combination of the two  
55 will serve as the best source of information for forecasting may depend on how far into the future  
56 we are attempting to forecast (Harris et al., 2018). This potential dependency on the “forecast  
57 horizon” (*sensu* Hyndman and Athanasopoulos 2018) reflects lags in the response of ecologi-  
58 cal conditions to environmental change, shifts in the importance of ecological processes with  
59 time scale (Levin, 1992; Rosenzweig et al., 1995), and differences between time-series and spatial  
60 gradients in the range of environmental conditions represented in observed data (Fig. 1). At  
61 short forecast horizons (days to years), dynamics will reflect the physiological and demographic  
62 responses of the organisms present at a site more than turnover of genotypes or species, envi-  
63 ronmental conditions are likely to stay within the range of historical variation, and the current  
64 state of the system is likely to capture the influence of unmeasured processes. As a result, for  
65 near-term forecasts time-series approaches may capture the key dynamics and provide accurate  
66 predictions.

67 In contrast, at long forecast horizons (decades to centuries), environmental conditions that  
68 have not been historically observed are likely to not only occur but to persist long enough to  
69 drive significant turnover of genotypes and species along with changes in the flux of energy and  
70 nutrients. At these long scales, the current state of the system may be little help in predicting the  
71 future state. For the century-scale forecasts often featured in biodiversity and species-distribution  
72 modeling, space-for-time approaches may effectively capture the response of ecosystems to ma-  
73 jor shifts in climate over long periods, producing better long-term forecasts than time-series  
74 approaches. Using different modeling approaches for different forecast horizons is common in  
75 other disciplines. For example, meteorological models for short-term weather forecasts differ  
76 substantially in spatial and temporal resolution and extent from the global circulation models  
77 used to predict long-term changes in climate.

78 Here we use simulation models to 1) demonstrate that the best model-building approaches  
79 for ecological forecasting depend on the time horizon of the forecast, and 2) explore how time-  
80 series and space-for-time approaches might be combined via weighted averaging to make better  
81 forecasts at intermediate time scales. We conduct two simulation case studies, one focused on  
82 how interspecific interactions affect the population dynamics of a focal species, and the second  
83 focused on an eco-evolutionary scenario. Our analyses show that:

- 84 1. For short-term forecasts, phenomenological time-series approaches are hard to beat, whereas  
85 longer-term forecasts require accounting for the influence of slow processes such as evolu-  
86 tionary and ecological selection as well as dispersal.
- 87 2. Different kinds of data reflect the operation of different processes: longitudinal data cap-  
88 ture autocorrelation and fast responses of current assemblages to interannual environmental  
89 variation, while data spanning spatial gradients capture the long-term outcome of interac-  
90 tions between fast and slow processes. Whether predictive models should be trained using  
91 longitudinal or spatial data sets, or both, depends on the time-scale of the desired forecast.

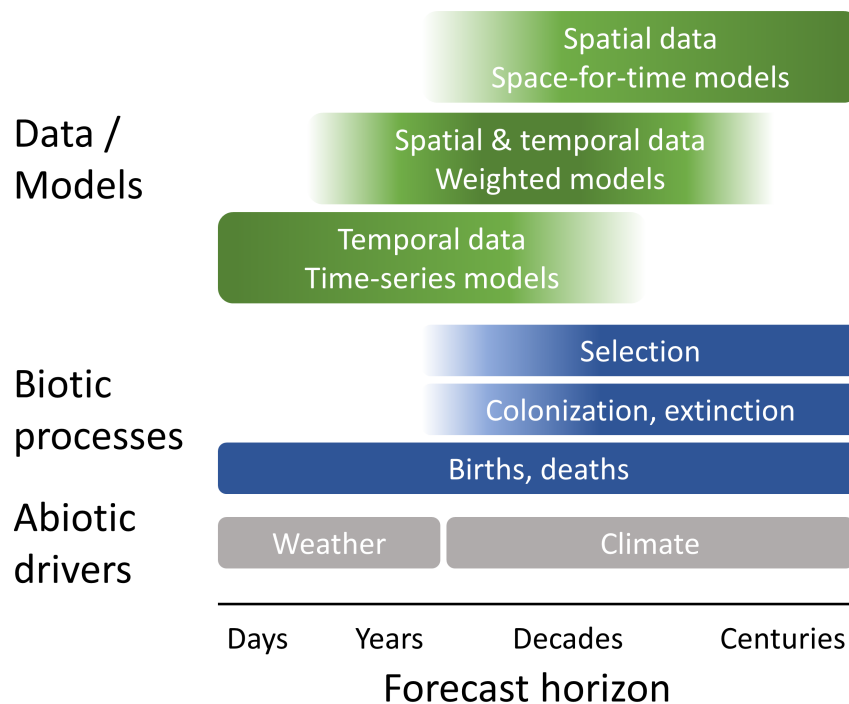

Figure 1: Fast and slow processes operate at different time scales, and are reflected in different kinds of datasets. Fast processes, such as births, deaths, and individual growth, operate at all time scales, but are the exclusive drivers of the short-term dynamics captured in most time series datasets. Slower processes, such as evolutionary selection on genotype frequencies, ecological selection on species abundances, and colonization and extinction, interact with fast processes to drive dynamics over the long-term. The influence of these slow processes is seen in very long time series, or in spatial gradients. Understanding dynamics at intermediate time scales requires integrating information from spatial and temporal data sources. We propose a model weighting approach; mechanistic spatiotemporal modeling is another alternative. The time scales shown here were chosen with vascular plants in mind, but the same concepts would apply for much shorter-lived organisms but at shorter time scales.

- 92 3. A key challenge for future research is determining the rate at which slow processes begin to  
93 influence dynamics.

## 94 **Modeling approach**

95 In two case studies, we simulated the effects of an increase in temperature on simple systems  
96 with known dynamics. The “truth” is represented by a model that is mechanistic for at least one  
97 important process, but we treat the model as unknown when analyzing the data and we assumed  
98 that perfectly recovering this model would not be possible in practice. We began each simulation  
99 under stationary temperature, allowing the system to equilibrate; we call this the baseline phase.  
100 We then increased temperature progressively over a period of time, followed by a second period  
101 of stationary, now elevated, temperature. The objective was to forecast the response of the system  
102 to the temperature increase based on data gathered during the baseline period.

103 We made forecasts based on two phenomenological models, each representing processes op-  
104 erating at different time scales. One model represents the time-series or “temporal approach.” We  
105 correlated interannual variation in an ecological response with interannual variation in the envi-  
106 ronment at just one site. The other model represents the space-for-time substitution approach,  
107 which we call the “spatial approach” for brevity. We correlated the mean environment with the  
108 mean of an ecological state or rate across many sites. We compared forecasts from both models  
109 to the simulated dynamics to determine how well the two approaches performed at different  
110 forecast horizons. We also assessed the potential for combining the information available in tem-  
111 poral and spatial patterns by using a weighted average of the forecasts from the temporal and  
112 spatial approaches optimized to best match the (simulated) observations. We then studied how  
113 the optimal model weights changed over time. We expected the temporal model to best predict  
114 short-term dynamics, the spatial model to best predict long-term dynamics, while the weighted  
115 model would show potential to provide the best forecasts at transitional, intermediate time scales.  
116 The three statistical models are described in Supporting Information (Appendix A) and all code  
117 for both case studies is available at Github (<https://github.com/pbadler/space-time-forecast>).

### 118 **Community turnover example**

119 Conservation biologists and natural resource managers often need to anticipate the impact of en-  
120 vironmental change on the abundance of endangered species, biological invaders, and harvested  
121 species. Although the managers may be primarily interested in just one focal species, skillful  
122 prediction might require considering interactions with many other species, greatly complicating  
123 the problem. But at what forecast horizon do altered species interactions become impossible  
124 to ignore? We explored this question using a metacommunity model developed by Alexander  
125 et al. (2018) to study how community responses to increasing temperature depend on the inter-  
126 play between within-site demography and competitive interactions and the movement of species  
127 across sites. The model features Lotka-Volterra competitive interactions among plants within  
128 sites that are arrayed along an elevation and temperature gradient. Composition varies along the  
129 gradient because of a trade-off between growth rate and cold tolerance: cold sites are dominated  
130 by slow-growing species that can tolerate low temperatures, while warm sites are dominated by  
131 fast-growing species that are cold intolerant. Multiple species can coexist within sites because  
132 all species experience stronger competition from conspecifics than from heterospecifics. Sites  
133 are linked by dispersal: a specified fraction of each species’ offspring leaves the site where they  
134 were produced and reaches all other sites with equal probability. We provide a more detailed  
135 description of the model in SI Appendix B.

136 We first simulated a baseline period with variable but stationary temperature, followed by  
137 a period of rapid temperature increase, and then a final period of stationary temperature. In-  
138 terannual variation in temperature is the same at all sites, but mean temperature varies among  
139 sites. All sites experienced the same absolute increase in mean temperature. We focused on the  
140 biomass dynamics of one focal species that dominated the central site during the baseline period.

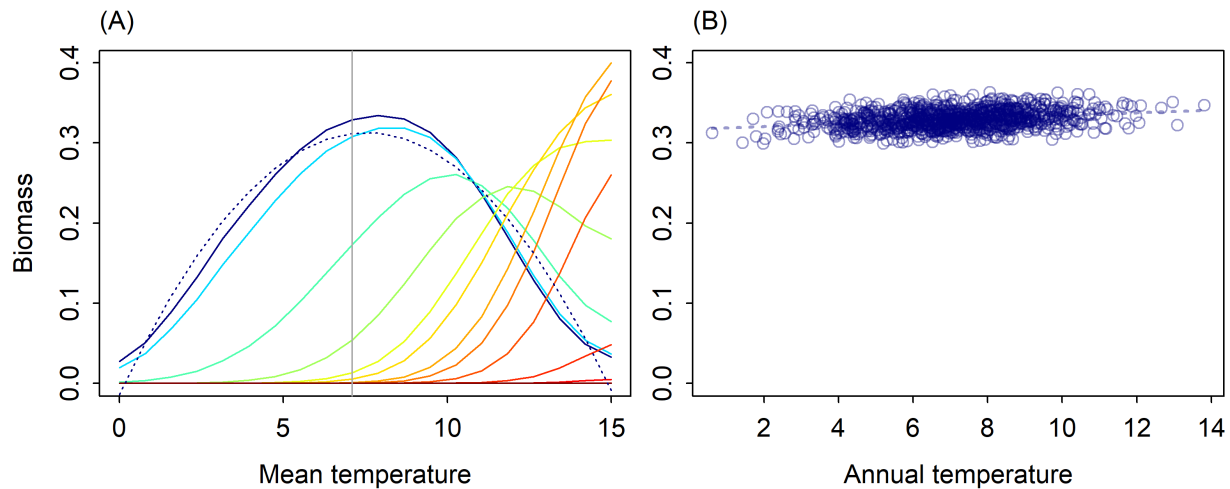

Figure 2: (A) Mean biomass by species (colors) across the temperature gradient during the baseline period. The focal species, dominant at the site in the center of the gradient (vertical gray line), is shown in dark blue. The dashed blue line shows predictions from the spatial model. (B) Annual biomass of the focal species at the central site during the baseline period. The dashed line shows predictions from the temporal model.

141 During the baseline period there were strong spatial patterns across the mean temperature  
142 gradient. Individual species, including our focal species, showed classic, unimodal “Whittaker”  
143 patterns of abundances across the gradient (Fig. 2A). These spatial patterns are the basis for  
144 our “spatial model” of the temperature-biomass relationship for our focal species (Fig. 2A).  
145 In contrast to the strong spatial patterns, population and community responses to interannual  
146 variation in temperature within sites were weak. At our focal site in the center of the gradient, the  
147 biomass of the focal species was quite insensitive to interannual variation in temperature, but  
148 showed strong temporal autocorrelation (Fig. 2B). Our “temporal model” estimates this weak,  
149 linear temperature effect, along with the strong lag effect of biomass in the previous year.

150 We fit both a temporal and a spatial statistical model to forecast the effect of a temperature  
151 increase (Fig. 3A) on the focal species’ biomass at one location in the center of the tempera-  
152 ture gradient. The predictions from the spatial and temporal models contrasted markedly, with  
153 the temporal model predicting a large increase in biomass and the spatial model predicting a  
154 decrease. Initially, the simulated abundances followed the increase predicted by the temporal  
155 model, but as faster-growing species colonized and increased in abundance at the focal site, the  
156 biomass of the focal species decreased, eventually falling below its baseline level (Fig. 3B).

157 To combine the temporal and spatial model into a single forecast, we fit a weighting paramete-  
158 r,  $\omega$ , which varies over time and is bounded between 0 and 1. At any time point,  $t$ , this weighted  
159 forecast is  $\omega \cdot T(N_{t-1}, K_t) + (1 - \omega) \cdot S(K_t)$  where  $T$  is the temporal model, which depends on  
160 population size,  $N$ , and expected temperature,  $K$ , and  $S$  is the spatial model, which depends only

161 on  $K$  (see SI Appendix A for a full description of the approach). The weighted model accurately  
162 predicts the simulated dynamics across the full forecast horizon (Fig. 3B). It also shows that the  
163 most rapid shifts in the model weights occurred during the period when warm-adapted, faster  
164 growing species were increasing most rapidly in abundance (Fig. 3C). However, the reason the  
165 weighted models works so well is that the weights were determined by fitting directly to the  
166 data. Unlike our spatial and temporal model forecasts, we did not generate out-of-sample pre-  
167 dictions from the weighted model; it merely provides a convenient way to quantify how rapidly  
168 dynamics shift from being dominated by interannual variation captured in the temporal model  
169 (time  $t = 0$  to  $t \approx 1250$  in Fig. 3B) to being dominated by the steady-state equilibrium captured  
170 by the spatial model (time  $t \geq 2500$ ). A true forecast from the weighted model would require a  
171 method to determine the model weights *a priori*.

172 The compositional turnover affecting our focal species also influences total biomass, linking  
173 community and ecosystem dynamics. We repeated our focal species analysis for total commu-  
174 nity biomass, and the results were similar: the temporal model initially made the best forecasts  
175 immediately following the onset of the temperature increase, but as the identity and abundances  
176 of species at the study site changed, the model weights rapidly shifted to the spatial model (SI  
177 Figs. S-1 and S-2).

## 178 **Eco-evolutionary example**

179 Evolutionary adaptation is a key uncertainty in predicting how environmental change will im-  
180 pact a focal population at a given location (Hoffmann and Sgro, 2011). Like the shifts in species  
181 composition illustrated in the previous example, shifts in genotype frequencies can also influ-  
182 ence dynamics and forecasts at different time scales. Although shifts in genotype frequencies  
183 at the population level are analogous to changes in species composition at the community level,  
184 the mechanisms are distinct: heterozygosity and genetic recombination have no analogue at the  
185 community level. We demonstrate how these processes influence short and long-term forecasts  
186 with a standard eco-evolutionary model for a hypothetical annual plant population in which  
187 fecundity is temperature dependent, and different genotypes have different temperature optima  
188 (Fig. 4A). Our model describes how the local density of each genotype changes between years,  
189 which depends on temperature and genotype densities in the previous year. Transient temporal  
190 dynamics are computed directly from the model; these dynamics define our temporal forecast.  
191 To create “spatial data”, we simulated the equilibrium density of each genotype under differ-  
192 ent mean temperatures. The pattern of equilibrium densities across a gradient in mean annual  
193 temperature defines our spatial forecast: cold sites will be dominated by the cold-adapted ho-  
194 mozygous genotype, warm sites will be dominated by the heat-adapted homozygous genotype,  
195 and intermediate sites will be dominated by the heterozygous genotype (Fig. 4B). The full model  
196 description is provided in SI Appendix C.

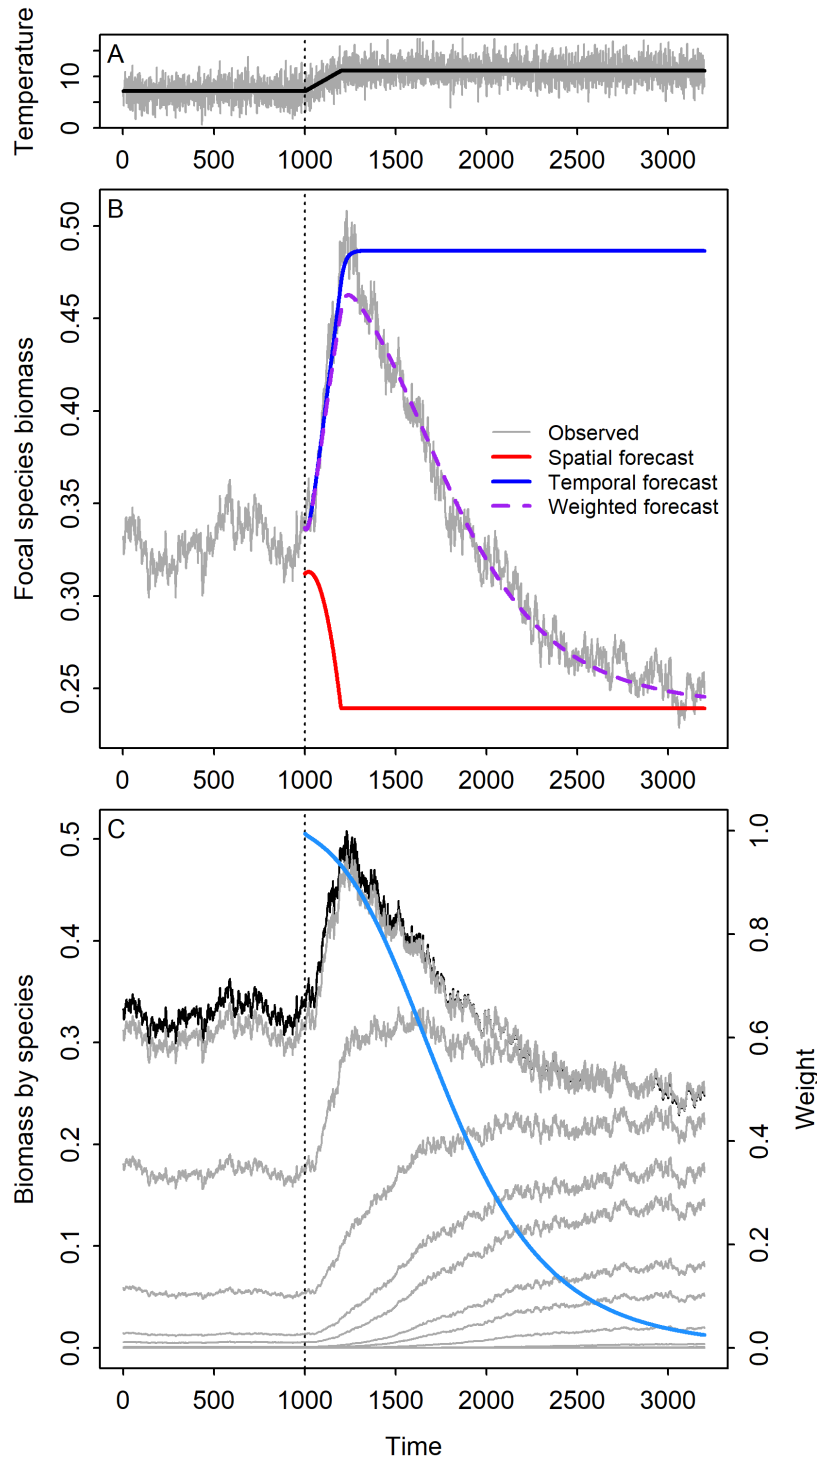

Figure 3: (A) Simulated annual temperatures (grey) and expected temperature (black), which was used to make forecasts, at the focal site. (B) Simulated focal species biomass and forecasts from the spatial, temporal and weighted models at the focal site in the metacommunity model. (C) Simulated changes in biomass of the focal species (black) and all other species (grey), and the weight given to the temporal model for focal species biomass (blue). Year 1000 in each panel corresponds to the start of the temperature increase.



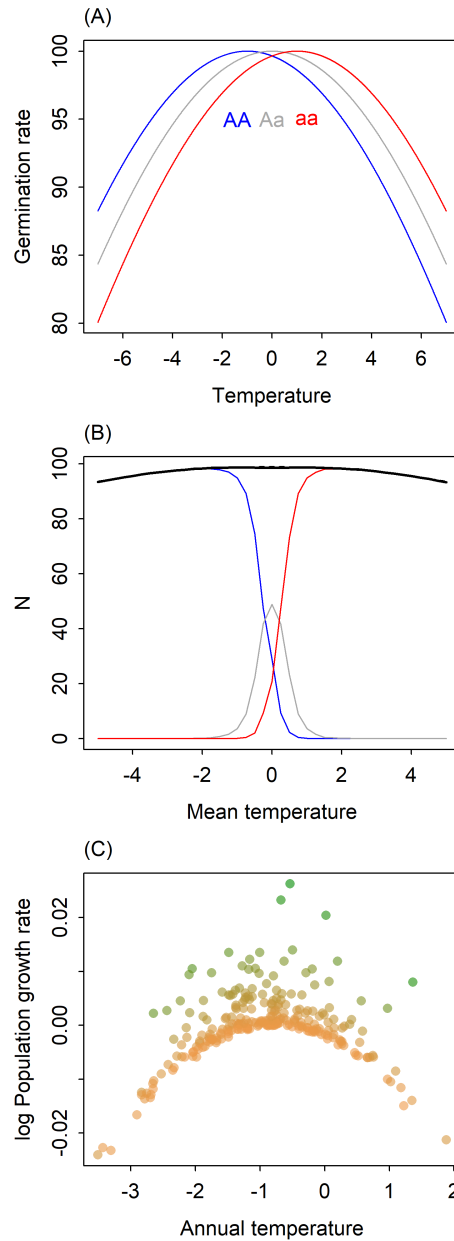

Figure 4: (A) Reaction norms of the three genotypes. (B) The spatial pattern of individual genotypes (colors) and total population abundance (black) at sites arrayed across a gradient of mean annual temperature. The dashed line shows predictions from an empirical “spatial model,” a linear regression that describes mean population size as a function of mean temperature. (C) The relationship between annual temperature and per capita growth rate at a location with a mean temperature that favors the cold-adapted genotype. Colors show population size (the green to brown gradient depicting low to high population density), which influences the population growth rate through density dependence.

197 The spatial pattern shown in Fig. 4B is the outcome of steady-state conditions. But at any one  
198 site, the population’s short-term response to temperature will be determined by the dominant

199 genotype's reaction norm (Fig. 4A). For example, at a cold site dominated by the cold-adapted  
200 homozygous genotype, a warmer than average year would cause a decrease in population size  
201 due to decreases in fecundity (blue line in Fig. 4A), even though the heat-adapted homozygote  
202 might perform optimally at that temperature. However, if warmer than normal conditions persist  
203 for many years, then genotype frequencies should shift, and the heat-adapted homozygote will  
204 compensate for the decreases of the cold-adapted genotype.

205 To demonstrate these dynamics, we simulated a diploid annual plant population at a colder  
206 than average site. During the baseline period, the population is dominated by the cold-adapted  
207 genotype. We used the simulated data from this baseline period to fit an empirical model that  
208 assumes no knowledge of the underlying eco-evolutionary process. This empirical temporal  
209 model (Appendix A) predicts population growth rate as a function of annual temperature and  
210 population size (Fig. 4C). We then imposed a period of warming, followed by a final period of  
211 higher stationary temperature (Fig. 5 top).

212 With the onset of warming, the population crashed as the cold-adapted genotype decreased  
213 in abundance. Eventually, frequencies of the heterozygous genotype and the warm-adapted  
214 homozygous genotype began to increase and the population recovered (Fig. 5 bottom). The  
215 temporal model (solid blue line in Fig. 5) accurately predicted the impact of the initial warming  
216 trend, but eventually became too pessimistic, while the spatial model (solid red line in Fig. 5)  
217 did not handle the initial trend but accurately predicted the eventual, new steady state (Fig. 5  
218 bottom).

219 As in the community turnover example, we also fit a weighted average of the spatial and  
220 temporal model, with the weights changing over time. This weighted model initially reflected  
221 the temporal model (decrease from  $t = 500$  to  $t = 600$ ), but then rapidly transitioned to reflect the  
222 spatial model ( $t \geq 700$ ). The rapid transition in the weighting term,  $\omega$ , occurred during the period  
223 of most rapid change in genotype frequencies (Fig. S-3). The weighted model's predictions look  
224 impressively accurate, but, as in the community turnover example, that is because we used the  
225 full, simulated time series to fit the weighting term. A true forecast would require an independent  
226 method to predict how the model weights shift over time.

## 227 Discussion

228 Ecological forecasts are typically made using either a space-for-time substitution approach based  
229 on models fit to spatial data or using dynamic models fit to time-series data. Our results demon-  
230 strate that these two approaches can make very different predictions about the future state of eco-  
231 logical systems. Which approach provides the most accurate forecasts depends on the forecast-  
232 horizon. In our simulations, time-series approaches performed best for short-term forecasts,  
233 whereas models based on spatial data made more accurate long-term forecasts. In addition, our  
234 simulations demonstrate extended transitional periods during which neither the time-series or  
235 the spatial approach is effective on its own. The challenge is determining what is "short-term,"  
236 what is "long-term," and how to handle the many forecasts we need in ecology which fall in

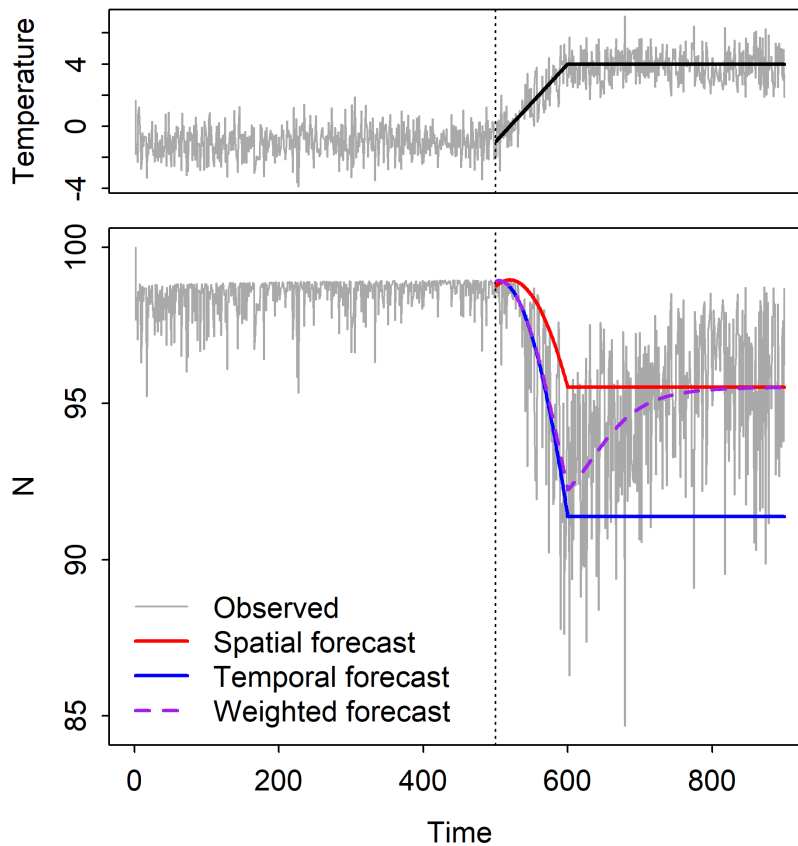

Figure 5: (Top) Simulated annual temperatures (grey) and expected temperature (black), which was used to make forecasts. (Bottom) Simulated population size and forecasts from the spatial, temporal and weighted models.

237 between. We have proposed that a weighted combination of the time-series and space-for-time  
238 approaches may produce better forecasts at these intermediate forecast horizons.

239 We designed our simulation studies to illustrate how the change in model performance with  
240 increasing forecast horizon reflects differences in the types and scales of processes captured by  
241 spatial and temporal data sets. How could these hypotheses be tested with empirical data?  
242 The hypothesis that time-series models will be most effective for near-term forecasts already has  
243 empirical support, in the form of recent analyses of biodiversity forecasts at time scales from  
244 one to ten years (Harris et al., 2018). The result should not be surprising, since local time-series  
245 data capture demographic processes, lagged effects, and responses of current assemblages to  
246 small changes in environmental conditions. In addition, the state of the system in the near  
247 future depends heavily on the current state. Since short-term forecasts do not typically require  
248 extrapolating into novel conditions, a model based on the historical range of variation which  
249 incorporates lags and accurate initial conditions is likely to be successful.

250 Space-for-time modeling approaches for predicting long-term, steady-state outcomes of eco-  
251 logical change have also been tested empirically, primarily via hind-casting. Overall, the results  
252 are mixed: some tests show reasonable prediction of changes in community composition (Blois  
253 et al., 2013; Illán et al., 2014) or species distributions (Norberg et al., 2019), supporting the hy-  
254 pothesis that datasets spanning spatial gradients capture the long-term outcome of interactions  
255 between fast processes and slower processes such as ecological and evolutionary selection, dis-  
256 persal, and responses to large changes in the environment. Other attempts to validate predictions  
257 from space-for-time models have been discouraging (Worth et al., 2014; Illán et al., 2014; Davis  
258 et al., 2014; Brun et al., 2016; Veloz et al., 2012), indicating violations of model assumptions or ef-  
259 fects of transient dynamics. However, predictions from the space-for-time approaches are rarely  
260 compared directly to predictions from time-series models (Harris et al. 2018 but see Renwick  
261 et al. 2018). We need more such comparisons to identify the appropriate modeling approach for  
262 different forecast horizons.

263 The greatest empirical challenge will be testing our hypothesis that a weighted average of  
264 spatial and temporal models will make the best forecasts at intermediate time scales. There are  
265 two problems: finding appropriate data and determining the model weights *a priori*. Many data  
266 sets have both a longitudinal and spatial dimension, but we could not think of one which also  
267 featured a clear ecological response to significant environmental change. Surely such datasets  
268 exist, and we hope researchers who work with them will test our proposed weighted model. De-  
269 termining model weights may be more difficult. In our simulations, we fit the weights directly to  
270 the simulated data, which is impossible to do for actual forecasting when the future is unknown.  
271 We need new theory or empirical case studies in order to assign these weights *a priori*.

272 Theory could explore the influence of different parameters on the rate at which slow processes  
273 begin to influence dynamics. The effects of some parameters are intuitive: in the community  
274 turnover example, increasing the fraction of dispersing individuals caused a more rapid shift in  
275 species composition and in model weights (Fig. 6A). Other parameters have less intuitive effects:  
276 we expected that increasing the temperature tolerance of genotypes in the evo-evolutionary ex-  
277 ample would accelerate the shift in model weights by maintaining higher genetic diversity. Our  
278 simulations showed the opposite effect, with wider tolerances slowing the shift in model weights  
279 (Fig. 6B), presumably by decreasing the strength of selection. Additional factors to consider  
280 include organism lifespans and the magnitude of directional environmental change relative to  
281 historical interannual variation.

282 Empirical research could inform model weights by accumulating enough case studies to in-  
283 fer patterns in the weighting functions and guide applications in new systems. Developing  
284 rules of thumb would require testing many forecasts from both time-series and spatial models  
285 across a range of time-horizons. This effort may require a novel integration of typically disparate  
286 approaches, such as analyses of paleoecological data (e.g., Worth et al. 2014), long-term observa-

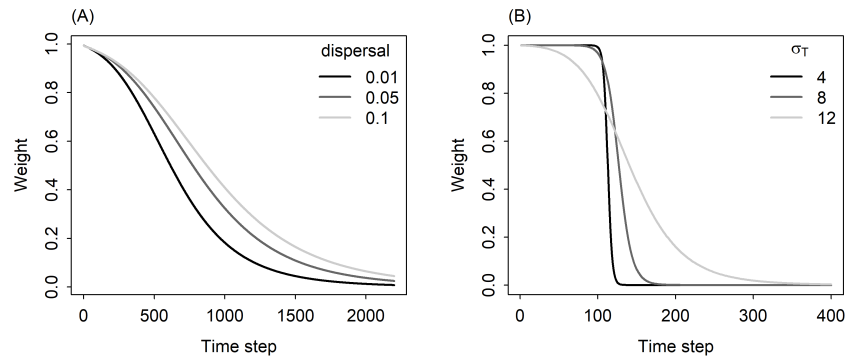

Figure 6: The rate of change in the weight of the temporal forecast (y-axis) depends on (A) the fraction of propagules dispersing in the community turnover example and (B) on the temperature tolerance of genotypes, given by  $\sigma_T$  (larger values indicate wider thermal niches) in the eco-evolutionary example. Year 0 in these figures corresponds to the start of the temperature increase.

287 tional (e.g., Nice et al. 2019) or experimental data (e.g., Silvertown et al. 2006), and model systems  
288 with short-generation times (e.g., Good et al. 2017).

289 An alternative to a weighted combination of predictions from time-series and space-for-time  
290 models is to rely on fully process-based models. If we could accurately characterize all of the  
291 processes governing a system, then a model based on that understanding should make accurate  
292 predictions at all time-horizons. For example, rather than fitting phenomenological models to  
293 our simulated time-series, we could have fit the exact process-based models that we used to gen-  
294 erate those time-series. Assuming reasonable estimates of the parameter, those models would  
295 have accurately predicted the dynamics at all forecast horizons. Process-based models should  
296 also be more robust for making predictions outside of historically observed conditions and even  
297 beyond the conditions observed across spatial gradients, which will be especially important for  
298 making predictions in a future with increasingly novel combinations of environment and species  
299 interactions (Williams and Jackson, 2007). Unfortunately, in most cases this approach is not cur-  
300 rently feasible because we lack a detailed knowledge of all the complex and interacting processes  
301 influencing the dynamics of real ecological systems. Even if the general form of the models was  
302 known, estimating the high number of parameters and quantifying how they vary across ecosys-  
303 tems typically requires more data than is currently available even for well studied systems. As  
304 a result, models used for ecological forecasting will include at least some phenomenological  
305 components. But that does not mean that phenomenological forecast models do not benefit  
306 from process-based understanding. The message from our simulations is that different processes  
307 should be considered for different forecast time-scales, and this can be done by fitting models  
308 to different kinds of datasets. Even when process-level understanding does not enable a fully  
309 mechanistic model, it can improve the specification of phenomenological models.

310 While fully process-based models may not be practical, there are more mechanistic alterna-  
311 tives to our phenomenological, weighted model for integrating spatial and temporal information.

312 Spatiotemporal statistical modeling approaches are being developed to study patterns and pro-  
313 cesses of interest to ecological forecasters, such the spread of an invasive species or population  
314 status of a threatened species (Wikle, 2003; Williams et al., 2017; Schliep et al., 2018). Because  
315 these models include both fast processes, such as births and deaths, and slower processes, such as  
316 colonization and extinction dynamics, they have the potential to make better predictions at inter-  
317 mediate forecast horizons than purely spatial or temporal models. However, these spatiotempo-  
318 ral models have rarely been used in a forecasting context, due to a combination of data limitation  
319 and computational challenges. Many data sources contain either spatial or temporal variation,  
320 but not both, and when spatiotemporal datasets are available they often involve irregular sam-  
321 pling, creating challenges for modeling. Fitting and generating predictions from spatiotemporal  
322 models is also computationally intensive, especially with large datasets (McDermott and Wikle,  
323 2017). Fortunately, thanks to large-scale monitoring efforts from remote sensing platforms, the  
324 National Ecological Observatory Network (<https://www.neonscience.org/>), and community sci-  
325 ence projects (e.g., eBird), large scale spatiotemporal data is increasingly available. In addition,  
326 new methods for spatiotemporal forecasting are being developed that address existing compu-  
327 tational challenges (McDermott and Wikle, 2017), and access to high performance computing  
328 resources is increasingly common. Given these developments, future ecological forecasting ef-  
329 forts should explore spatiotemporal approaches and assess whether they improve predictions at  
330 intermediate time scales relative to traditional spatial or temporal models.

331 Our results have important implications for the emerging field of ecological forecasting. First,  
332 they suggest that evaluating both near-term and long-term forecasts will be essential as research  
333 on forecasting methods accelerates. Second, while single approaches may perform reasonably  
334 well at either short or long forecast horizons, skillful predictions at intermediate time horizons  
335 may require a combination of information from spatial and temporal patterns. Intermediate  
336 time horizons pose challenges in other forecasting contexts as well. Weather forecasts based  
337 on regional-scale meteorological models are very effective for forecasting a week to ten days in  
338 advance, but then become largely uninformative. Forecasting these intermediate scales has been  
339 challenging in meteorology and will likely be challenging in ecology as well. While the recent  
340 emphasis on near-term iterative forecasting (Dietze et al., 2018) is the logical and tractable starting  
341 point, we also need to build understanding and capacity for forecasting ecological dynamics  
342 across all temporal scales of interest.

### 343 **Acknowledgements**

344 We thank Heather Lynch and Juan Manuel Morales for comments that improved early drafts of  
345 the paper. PBA was supported by the Utah Agriculture Experiment Station. EPW was supported  
346 by the Gordon and Betty Moore Foundation's Data-Driven Discovery Initiative through Grant  
347 GBMF4563.

## Literature cited

- Alexander, J. M., L. Chalmandrier, J. Lenoir, T. I. Burgess, F. Essl, S. Haider, C. Kueffer, K. McDougall, A. Milbau, M. A. Nuñez, A. Pauchard, W. Rabitsch, L. J. Rew, N. J. Sanders, and L. Pellissier. 2018. Lags in the response of mountain plant communities to climate change. *Global Change Biology*, **24**:563–579.
- Blois, J. L., J. W. Williams, M. C. Fitzpatrick, S. T. Jackson, and S. Ferrier. 2013. Space can substitute for time in predicting climate-change effects on biodiversity. *Proceedings of the National Academy of Sciences*, **110**:9374–9379.
- Brun, P., T. Kiørboe, P. Licandro, and M. R. Payne. 2016. The predictive skill of species distribution models for plankton in a changing climate. *Global Change Biology*, **22**:3170–3181.
- Clark, J., S. Carpenter, M. Barber, S. Collins, A. Dobson, J. Foley, D. Lodge, M. Pascual, R. Pielke, W. Pizer, C. Pringle, W. Reid, K. Rose, O. Sala, W. Schlesinger, D. Wall, and D. Wear. 2001. Ecological forecasts: An emerging imperative. *Science*, **293**:657–660.
- Dalgleish, H. J., D. N. Koons, M. B. Hooten, C. A. Moffet, and P. B. Adler. 2011. Climate influences the demography of three dominant sagebrush steppe plants. *Ecology*, **92**:75–85.
- Davis, E. B., J. L. McGuire, and J. D. Orcutt. 2014. Ecological niche models of mammalian glacial refugia show consistent bias. *Ecography*, **37**:1133–1138.
- Dietze, M. C. 2017. Prediction in ecology: a first-principles framework. *Ecological Applications*, **27**:2048–2060.
- Dietze, M. C., A. Fox, L. M. Beck-Johnson, J. L. Betancourt, M. B. Hooten, C. S. Jarnevich, T. H. Keitt, M. A. Kenney, C. M. Laney, L. G. Larsen, H. W. Loescher, C. K. Lunch, B. C. Pijanowski, J. T. Randerson, E. K. Read, A. T. Tredennick, R. Vargas, K. C. Weathers, and E. P. White. 2018. Iterative near-term ecological forecasting: Needs, opportunities, and challenges. *Proceedings of the National Academy of Sciences*, page 201710231.
- Elith, J. and J. R. Leathwick. 2009. Species distribution models: ecological explanation and prediction across space and time. *Annual Review of Ecology, Evolution, and Systematics*, **40**:677–697.
- Good, B. H., M. J. McDonald, J. E. Barrick, R. E. Lenski, and M. M. Desai. 2017. The dynamics of molecular evolution over 60,000 generations. *Nature*, **551**:45.
- Harris, D. J., S. D. Taylor, and E. P. White. 2018. Forecasting biodiversity in breeding birds using best practices. *PeerJ*, **6**:e4278.
- Hefley, T. J., M. B. Hooten, R. E. Russell, D. P. Walsh, and J. A. Powell. 2017. When mechanism matters: Bayesian forecasting using models of ecological diffusion. *Ecology Letters*, **20**:640–650.

- 380 Hoffmann, A. A. and C. M. Sgro. 2011. Climate change and evolutionary adaptation. *Nature*,  
381 **470**:479–485.
- 382 Houlahan, J. E., S. T. McKinney, T. M. Anderson, and B. J. McGill. 2017. The priority of prediction  
383 in ecological understanding. *Oikos*, **126**:1–7.
- 384 Hyndman, R. and G. Athanasopoulos. 2018. *Forecasting: Principles and Practice*. OTexts.
- 385 Illán, J. G., C. D. Thomas, J. A. Jones, W.-K. Wong, S. M. Shirley, and M. G. Betts. 2014. Precip-  
386 itation and winter temperature predict long-term range-scale abundance changes in Western  
387 North American birds. *Global Change Biology*, **20**:3351–3364.
- 388 Kleinhesselink, A. R. and P. B. Adler. 2018. The response of big sagebrush (*Artemisia tridentata*)  
389 to interannual climate variation changes across its range. *Ecology*, **99**:1139–1149.
- 390 Lauenroth, W. K. and O. E. Sala. 1992. Long-term forage production of North American short-  
391 grass steppe. *Ecological Applications*, **2**:397–403.
- 392 Levin, S. A. 1992. The problem of pattern and scale in ecology: the robert h. macarthur award  
393 lecture. *Ecology*, **73**:1943–1967.
- 394 McDermott, P. L. and C. K. Wikle. 2017. An ensemble quadratic echo state network for non-linear  
395 spatio-temporal forecasting. *Stat*, **6**:315–330.
- 396 Mouquet, N., Y. Lagadeuc, V. Devictor, L. Doyen, A. Duputié, D. Eveillard, D. Faure, E. Gar-  
397 nier, O. Gimenez, P. Huneman, F. Jabot, P. Jarne, D. Joly, R. Julliard, S. Kéfi, G. J. Kergoat,  
398 S. Lavorel, L. Le Gall, L. Meslin, S. Morand, X. Morin, H. Morlon, G. Pinay, R. Pradel, F. M.  
399 Schurr, W. Thuiller, and M. Loreau. 2015. REVIEW: Predictive ecology in a changing world.  
400 *Journal of Applied Ecology*, **52**:1293–1310.
- 401 Nice, C. C., M. L. Forister, J. G. Harrison, Z. Gompert, J. A. Fordyce, J. H. Thorne, D. P. Waetjen,  
402 and A. M. Shapiro. 2019. Extreme heterogeneity of population response to climatic variation  
403 and the limits of prediction. *Global Change Biology*, **25**:2127–2136.
- 404 Norberg, A., N. Abrego, F. G. Blanchet, F. R. Adler, B. J. Anderson, J. Anttila, M. B. Araújo,  
405 T. Dallas, D. Dunson, J. Elith, S. D. Foster, R. Fox, J. Franklin, W. Godsoe, A. Guisan, B. O'Hara,  
406 N. A. Hill, R. D. Holt, F. K. C. Hui, M. Husby, J. A. Kålås, A. Lehikoinen, M. Luoto, H. K. Mod,  
407 G. Newell, I. Renner, T. Roslin, J. Sojininen, W. Thuiller, J. Vanhatalo, D. Warton, M. White, N. E.  
408 Zimmermann, D. Gravel, and O. Ovaskainen. 2019. A comprehensive evaluation of predictive  
409 performance of 33 species distribution models at species and community levels. *Ecological*  
410 *Monographs*, **89**:e01370.
- 411 Renwick, K. M., C. Curtis, A. R. Kleinhesselink, D. Schlaepfer, B. A. Bradley, C. L. Aldridge,  
412 B. Poulter, and P. B. Adler. 2018. Multi-model comparison highlights consistency in predicted  
413 effect of warming on a semi-arid shrub. *Global Change Biology*, **24**:424–438.



- 414 Rosenzweig, M. L. et al. 1995. Species diversity in space and time. Cambridge University Press.
- 415 Sala, O. E., W. J. Parton, L. A. Joyce, and W. K. Lauenroth. 1988. Primary production of the central  
416 grassland region of the United States. *Ecology*, **69**:40–45.
- 417 Schliep, E. M., N. K. Lany, P. L. Zarnetske, R. N. Schaeffer, C. M. Orians, D. A. Orwig, and E. L.  
418 Preisser. 2018. Joint species distribution modelling for spatio-temporal occurrence and ordinal  
419 abundance data. *Global Ecology and Biogeography*, **27**:142–155.
- 420 Silvertown, J., P. Poulton, E. Johnston, G. Edwards, M. Heard, and P. Biss. 2006. The Park Grass  
421 Experiment 1856-2006: Its contribution to ecology. *Journal of Ecology*, **94**:814.
- 422 Urban, M. C., J. J. Tewksbury, and K. S. Sheldon. 2012. On a collision course: competition and  
423 dispersal differences create no-analogue communities and cause extinctions during climate  
424 change. *Proceedings of the Royal Society of London B: Biological Sciences*, **279**:2072–2080.
- 425 Veloz, S. D., J. W. Williams, J. L. Blois, F. He, B. Ottoï-Bliesner, and Z. Liu. 2012. No-analog  
426 climates and shifting realized niches during the late quaternary: implications for 21st-century  
427 predictions by species distribution models. *Global Change Biology*, **18**:1698–1713.
- 428 Ward, E. J., E. E. Holmes, J. T. Thorson, and B. Collen. 2014. Complexity is costly: a meta-  
429 analysis of parametric and non-parametric methods for short-term population forecasting.  
430 *Oikos*, **123**:652–661.
- 431 Wikle, C. K. 2003. Hierarchical Bayesian Models for Predicting the Spread of Ecological Processes.  
432 *Ecology*, **84**:1382–1394.
- 433 Williams, J. W. and S. T. Jackson. 2007. Novel climates, no-analog communities, and ecological  
434 surprises. *Frontiers in Ecology and the Environment*, **5**:475–482.
- 435 Williams, P. J., M. B. Hooten, J. N. Womble, G. G. Esslinger, M. R. Bower, and T. J. Hefley. 2017.  
436 An integrated data model to estimate spatiotemporal occupancy, abundance, and colonization  
437 dynamics. *Ecology*, **98**:328–336.
- 438 Worth, J. R. P., G. J. Williamson, S. Sakaguchi, P. G. Nevill, and G. J. Jordan. 2014. Environmental  
439 niche modelling fails to predict Last Glacial Maximum refugia: niche shifts, microrefugia or  
440 incorrect palaeoclimate estimates? *Global Ecology and Biogeography*, **23**:1186–1197.

## Appendices

### A Spatial, temporal and spatial-temporal-weighted models

The two simulation models in the main text describe how population size,  $N(x, t)$ , at location  $x$  changes over time ( $t$ ). We assume that the temperature,  $K(x, t)$ , at each location can vary in time and space. To forecast the dynamics generated by these simulations models, we fit a series of statistical models.

The spatial model, which we refer to as  $S$ , is a quadratic regression of the mean long-term population density at a location ( $\bar{N}(x)$ ) against the mean temperature at that location ( $\bar{K}(x)$ ). The quadratic term describes the unimodal relationship between  $\bar{N}$  and  $\bar{K}$ . The spatial statistical model is

$$\bar{N}(x) = S(\bar{K}(x)) = \beta_0^S + \beta_1^S \bar{K}(x) + \beta_2^S \bar{K}(x)^2 + \varepsilon \quad (1)$$

The temporal model, which we call  $T$ , starts with a time-series of “observed” population sizes, or total biomasses, at one location,  $N(t)$ , for  $t = 1 \dots n$  (the spatial index is suppressed because we only focus on one location at a time). In the community turnover example, we fit the following regression, which predicts biomass at time  $t + 1$  as a function of biomass ( $N(t)$ ) and annual temperature ( $K(t)$ ) at time  $t$ ,

$$\ln(N(t + 1)) = T(N(t), K(t)) = \beta_0^T + \beta_1^T \ln(N(t)) + \beta_2^T K(t) + \varepsilon \quad (2)$$

In the eco-evolutionary example, the response variable is the log of the population growth rate. The regression is

$$\ln\left(\frac{N(t + 1)}{N(t)}\right) = T(N(t), K(t)) = \beta_0^T + \beta_1^T \ln(N(t)) + \beta_2^T K(t) + \beta_3^T K(t)^2 + \varepsilon \quad (3)$$

This version of the temporal model returns a per capita growth rate on the log scale. To predict population size at the next time step, we exponentiate the growth rate and multiply it by the current population size:  $\exp(T(N(t), K(t)))N(t)$ .

The weighted model is a weighted average of predictions from the spatial and temporal models, with the weights changing as a function of time, here expressed as the forecast horizon. The weights change as a function of the square root of the forecast horizon, to allow rapid shifts in the model weights.

$$\text{logit}(\omega_t) = \beta_0^W + \beta_1^W \sqrt{t} \quad (4)$$

For the community turnover example, the predicted biomass from the weighted model is:

$$\hat{N}(t + 1) = \omega \cdot T(N(t), K(t)) + (1 - \omega) \cdot S(K(t)) \quad (5)$$

465 Again, we suppress the spatial subscript ( $x$ ) here because we are focused on densities at just  
466 one location. For the eco-evolutionary example, the predicted population size from the weighted  
467 model is:

$$\hat{N}(t+1) = \omega \cdot \exp(T(N(t), K(t)))N(t) + (1 - \omega) \cdot S(K(t)) \quad (6)$$

468 We used the `optim` function to estimate the  $\beta^W$ s that minimize the sum of squared errors,  
469  $(\hat{N}(t+1) - N(t+1))^2$ .

470 In the main text, we show the point forecasts but not the uncertainty around the forecasts.  
471 After exploring that uncertainty, we decided that presenting it would be misleading. For the spa-  
472 tial and, especially, the temporal statistical models, the uncertainty is unrealistically low, because  
473 the models are estimated with very large samples sizes from the simulations. Furthermore, the  
474 simulations do not include noise; the only reason there is any uncertainty is because the statis-  
475 tical models are slightly mis-specified with respect to the process models. Showing uncertainty  
476 for the weighted model would be even less meaningful, because it is not a true, out-of-sample  
477 forecast (parameters are fit directly to the observations for which we make predictions). The R  
478 code to compute uncertainties for the spatial and temporal forecasts is available on our Github  
479 repository (<https://github.com/pbadler/space-time-forecast>), but is commented out.

## 480 **B Description of the meta-community model**

481 Alexander et al. (2018) developed a meta-community model to represent dynamics of local com-  
482 munities arrayed along a one-dimensional elevation gradient, as influenced by three main pro-  
483 cesses: temperature-dependent growth, competition, and dispersal. Here we adapt their notation  
484 to be consistent our own.

485 The population size of species  $i$  in cell  $x$  at time  $t + 1$ ,  $N_i(x, t + 1)$ , is computed in two  
486 steps. The first step accounts for changes in local population sizes due to dispersal. In each  
487 local community, all species export a fraction ( $d$ ) of their local population to the two adjacent  
488 communities in the 1-dimensional landscape:

$$N'_i(x, t) = (1 - d) \cdot N_i(x, t) + \frac{d}{2} \cdot (N_i(x + 1, t) + N_i(x - 1, t)) \quad (7)$$

489 Here  $N'$  distinguishes the post-dispersal population size from the pre-dispersal population size.

490 The second step computes population growth, taking into account competition:

$$N_i(x, t + 1) = N'_i(x, t) + N'_i(x, t)[g_i(K(x) - Kmin_i) - c_i N'_i(x, t) - l_i \sum_k N'_k(x, t)] \quad (8)$$

491 In the absence of competition, the growth rate ( $g_i$ ) is determined by the difference between the  
492 temperature at site  $x$  ( $K(x)$ ) and the focal species' minimum temperature tolerance,  $Kmin_i$ , the  
493 lowest temperature at which a species can maintain a positive growth rate. Growth is further  
494 reduced by intraspecific and interspecific competition, parameterized by  $c_i$  and  $l_i$ . All species are

495 assigned the same value of  $c_i$ , which represents an additional effect of intraspecific competition  
 496 on top of interspecific competition. This stabilizes coexistence, since every species will exert  
 497 stronger intra- than interspecific competition. However, values of  $l$  vary among species to create  
 498 a trade-off between growth rates and competitive ability versus low temperature tolerance: fast-  
 499 growing species (high  $g_i$ ) are more tolerant of interspecific competition (low  $l_i$ ) but are more  
 500 limited by temperature (high  $Kmin_i$ ).

## 501 C Description of the eco-evolutionary annual plant model

**Haploid Model:** Begin with a haploid model that describes the number of seeds present in a seed bank.  $N_{i,t}$  is the number of seeds of species  $i$  at time  $t$ . The model is

$$\begin{aligned} N_{1,t+1} &= s_1[1 - g_1(K(t))]N_{1,t} + \frac{\lambda_1 g_1(K(t))N_{1,t}}{1 + \alpha_{11}g_1(K(t))N_{1,t} + \alpha_{12}g_2(K(t))N_{2,t}} \\ N_{2,t+1} &= s_2[1 - g_2(K(t))]N_{2,t} + \frac{\lambda_2 g_2(K(t))N_{2,t}}{1 + \alpha_{21}g_1(K(t))N_{1,t} + \alpha_{22}g_2(K(t))N_{2,t}} \end{aligned} \quad (9)$$

502 where  $g_i(K(t))$  is the probability of germination,  $K(t)$  is the temperature at time  $t$ ,  $s_i$  is the seed  
 503 survival probability for species  $i$ , and  $\lambda_i$  is the seed production rate per plant. Below we refer to  
 504 the  $\alpha_{ij}$  as intra- and inter-genotype competition coefficients.

505 **Diploid Model:** Consider a one-species diploid model. The genotypes are denoted by  $AA$ ,  $Aa$ ,  
 506 and  $aa$ . The number of each genotypes at time  $t$  is  $N_{AA}(t)$ ,  $N_{Aa}(t)$ , and  $N_{aa}(t)$ . The germination  
 507 rates for each genotype are  $g_{AA}(K(t))$ ,  $g_{Aa}(K(t))$ , and  $g_{aa}(K(t))$ . The seed survival probability  
 508 and seed production rate for genotype  $AA$  are  $s_{AA}$  and  $\lambda_{AA}$ , respectively. The analogous param-  
 509 eters for the other genotypes are similarly denoted. The competition coefficients are denoted by  
 510  $\alpha_{i,j}$ , e.g.,  $\alpha_{AA,AA}$  or  $\alpha_{AA,Aa}$ . Throughout we assume that gametes mix randomly in the population.

511 First consider the case where the competition coefficients are zero ( $\alpha_{i,j} = 0$ ). Let  $T$  denote the  
 512 total number of gamete-pairs produced in a given year,

$$T = \lambda_{AA}N_{AA}(t)g_{AA}(K(t)) + \lambda_{Aa}N_{Aa}(t)g_{Aa}(K(t)) + \lambda_{aa}N_{aa}(t)g_{aa}(K(t)). \quad (10)$$

The first term is the number of gamete-pairs produced by  $AA$  individuals. The second and third terms are the numbers of gamete-pairs produced by  $Aa$  and  $aa$  individuals, respectively. The proportion of  $A$  gametes ( $\phi_A$ ) and the proportion of  $a$  gametes ( $\phi_a$ ) are given by

$$\phi_A = \frac{\lambda_{AA}N_{AA}(t)g_{AA}(K(t)) + \frac{1}{2}\lambda_{Aa}N_{Aa}(t)g_{Aa}(K(t))}{T} \quad \text{and} \quad \phi_a = 1 - \phi_A. \quad (11)$$

Note that the  $T$  in the denominator of  $\phi_A$  shows up because we are computing proportions. Combining all of these we get the dynamics for each genotype,

$$\begin{aligned} N_{AA}(t+1) &= s_{AA}[1 - g_{AA}(K(t))]N_{AA}(t) + \phi_A^2 T \\ N_{Aa}(t+1) &= s_{Aa}[1 - g_{Aa}(K(t))]N_{Aa}(t) + \phi_A \phi_a T \\ N_{aa}(t+1) &= s_{aa}[1 - g_{aa}(K(t))]N_{aa}(t) + \phi_a^2 T \end{aligned} \quad (12)$$

Now consider the case where the competition coefficients are non-zero ( $\alpha_{i,j} \neq 0$ ). Including competition changes the way in which we compute  $T$ ,  $\phi_A$ , and  $\phi_a$ . Specifically, because the total number of seeds produced per year by each genotypes is reduced based on intra- and inter-genotype competition, the total number of gamete-pairs becomes

$$\begin{aligned} T &= \frac{\lambda_{AA}N_{AA}(t)g_{AA}(K(t))}{1 + \alpha_{AA,AA}g_{AA}(K(t))N_{AA}(t) + \alpha_{AA,Aa}g_{Aa}(K(t))N_{Aa}(t) + \alpha_{AA,aa}g_{aa}(K(t))N_{aa}(t)} \\ &+ \frac{\lambda_{Aa}N_{Aa}(t)g_{Aa}(K(t))}{1 + \alpha_{Aa,AA}g_{AA}(K(t))N_{AA}(t) + \alpha_{Aa,Aa}g_{Aa}(K(t))N_{Aa}(t) + \alpha_{Aa,aa}g_{aa}(K(t))N_{aa}(t)} \\ &+ \frac{\lambda_{aa}N_{aa}(t)g_{aa}(K(t))}{1 + \alpha_{aa,AA}g_{AA}(K(t))N_{AA}(t) + \alpha_{aa,Aa}g_{Aa}(K(t))N_{Aa}(t) + \alpha_{aa,aa}g_{aa}(K(t))N_{aa}(t)}. \end{aligned} \quad (13)$$

The first line is the number of gamete-pairs produced by  $AA$  individuals after accounting for the effects of competition. The second and third lines are the numbers of gamete-pairs produced by  $Aa$  and  $aa$  individuals, respectively. The proportions of  $A$  gametes and  $a$  gametes are

$$\begin{aligned} \phi_A &= \frac{1}{T} \frac{\lambda_{AA}N_{AA}(t)g_{AA}(K(t))}{1 + \alpha_{AA,AA}g_{AA}(K(t))N_{AA}(t) + \alpha_{AA,Aa}g_{Aa}(K(t))N_{Aa}(t) + \alpha_{AA,aa}g_{aa}(K(t))N_{aa}(t)} \\ &+ \frac{1}{2T} \frac{\lambda_{Aa}N_{Aa}(t)g_{Aa}(K(t))}{1 + \alpha_{Aa,AA}g_{AA}(K(t))N_{AA}(t) + \alpha_{Aa,Aa}g_{Aa}(K(t))N_{Aa}(t) + \alpha_{Aa,aa}g_{aa}(K(t))N_{aa}(t)} \\ \phi_a &= 1 - \phi_A \end{aligned} \quad (14)$$

Combining all of this results in the same model as above,

$$\begin{aligned} N_{AA}(t+1) &= s_{AA}[1 - g_{AA}(K(t))]N_{AA}(t) + \phi_A^2 T \\ N_{Aa}(t+1) &= s_{Aa}[1 - g_{Aa}(K(t))]N_{Aa}(t) + 2\phi_A \phi_a T \\ N_{aa}(t+1) &= s_{aa}[1 - g_{aa}(K(t))]N_{aa}(t) + \phi_a^2 T, \end{aligned} \quad (15)$$

513 but the definitions of  $T$ ,  $\phi_A$ , and  $\phi_a$  are given by equations (13) and (14) .

## 514 D Supplementary Figures

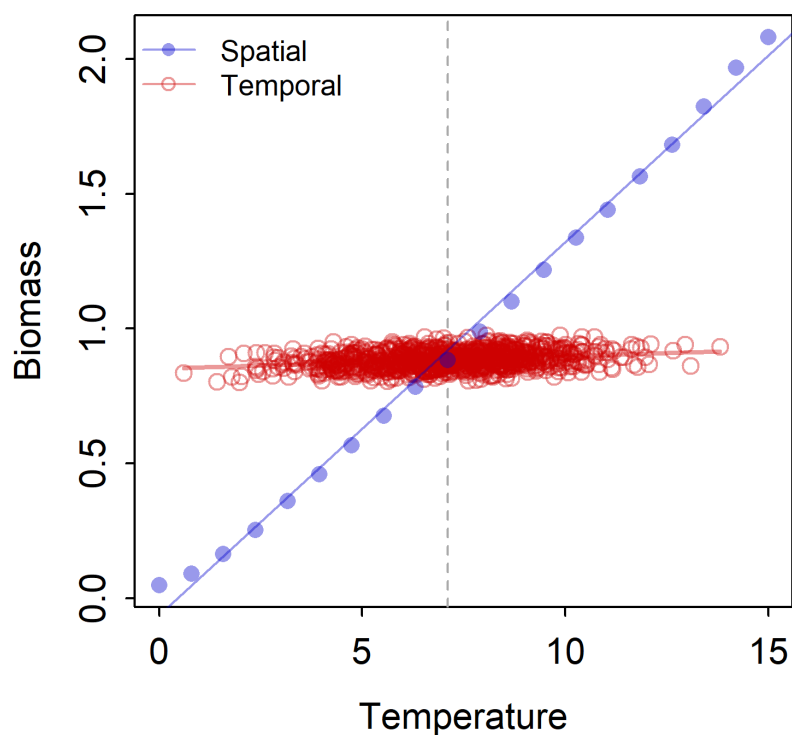

Figure S-1: (Results for total biomass from the community turnover model. Blue points show mean total biomass during the baseline period at locations across the temperature gradient, and the blue line shows predictions from the spatial model. Red points show annual total biomass during the baseline period as a function of annual temperature at the central site on the gradient. The red line shows predictions from the temporal model.

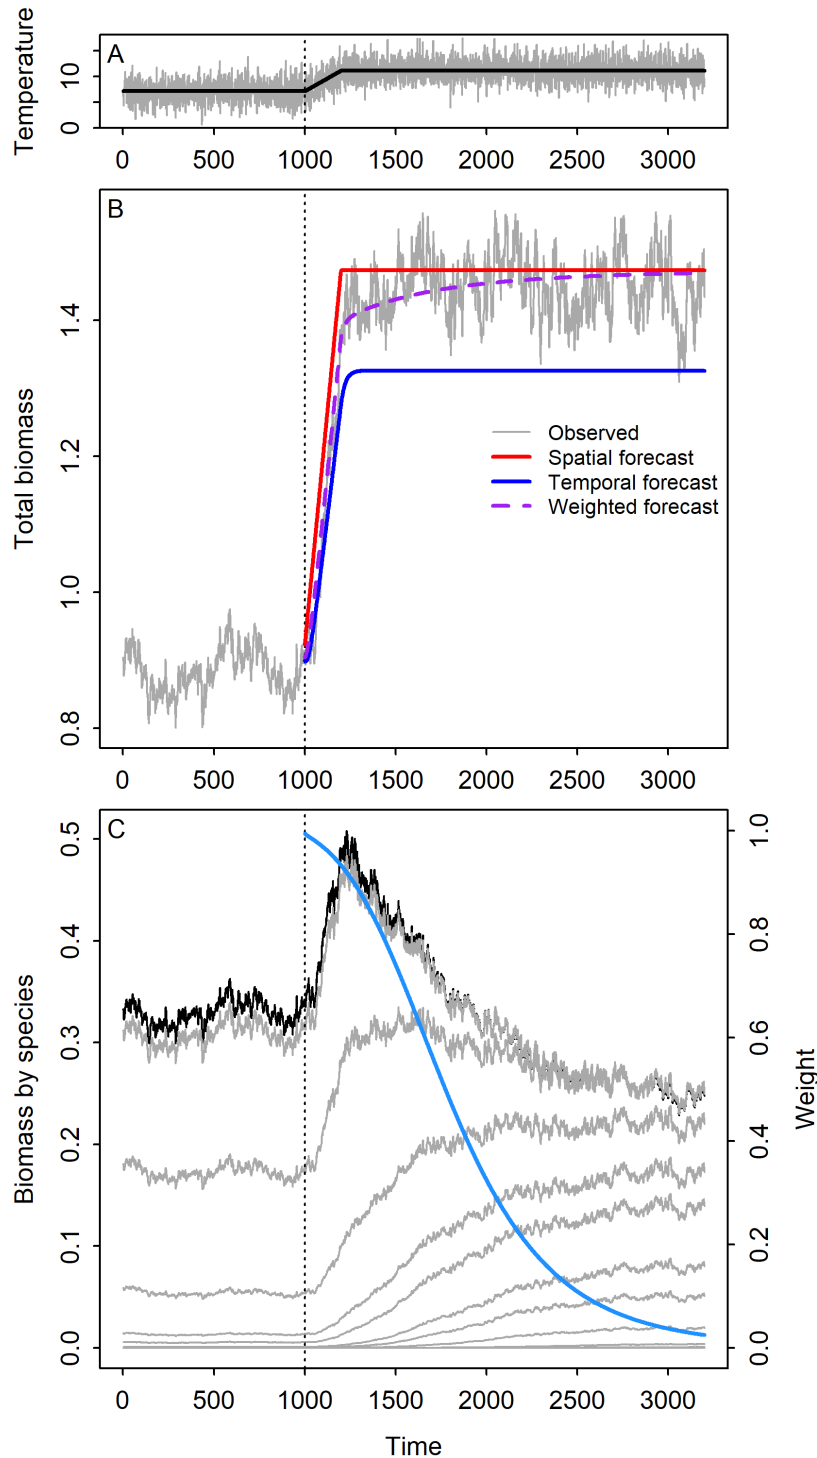

Figure S-2: Results for total biomass from the community turnover model. (A) Simulated annual temperatures (grey) and expected temperature (black), which was used to make forecasts, at the focal site. (B) Simulated total biomass and forecasts from the spatial, temporal and weighted models. (C) Simulated changes in biomass of all species (grey) at the focal site in the metacom- munity model, and the weight given to the temporal model for total biomass (blue). Year 1000 in this figure corresponds to the start of the temperature increase.

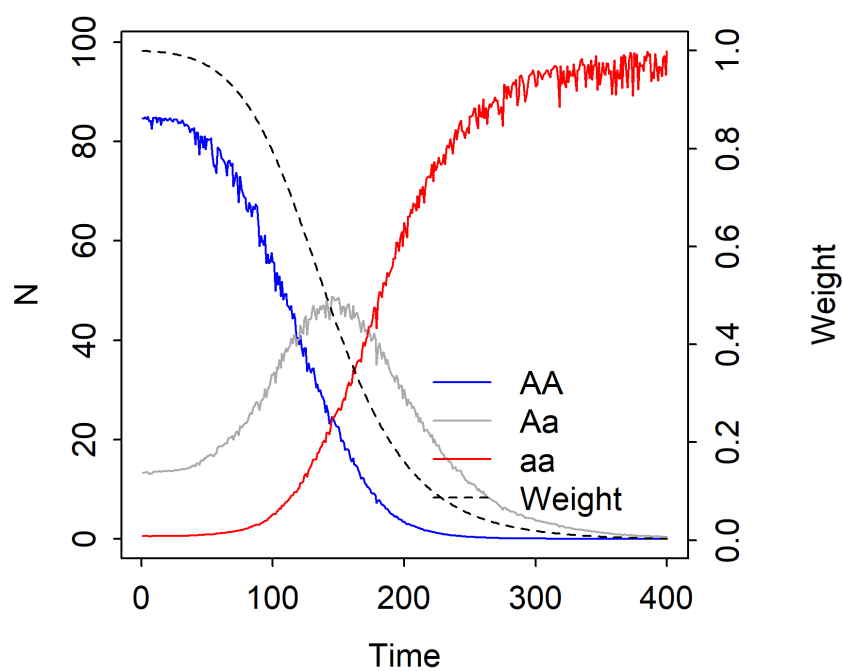

Figure S-3: Simulated shifts in genotype abundances, and the model weighting term,  $\omega$ , during the warming phase and the following stationary temperature phase. Year 0 in this figure corresponds to the start of the temperature increase.
